## Usefulness of the coronary artery calcium (CAC) score for statin prescription in primary prevention: results in over 16.000 assessments

M. Keller, S. Silber

Cardiology Practice, Munich, Germany

**Funding Acknowledgement:** Type of funding source: None

**Background:** The latest AHA/ACC cholesterol guidelines on primary prevention of coronary artery disease (CAD) recommend the use of the CAC-score to help in decision making for not using or using statins: If the CAC-score is 0, it is reasonable to withhold statin therapy (as long as higher conditions are absent). If CAC-score is 1 - 99, it is reasonable to initiate statin therapy for patients  $\geq 55$  years of age. If the CAC-score is  $\geq 100$ , it is reasonable to initiate statin therapy. Therefore, in the present analysis, we assessed the impact of these guidelines in everyday cardiology practice.

**Methods:** We analysed our data base with 16083 assessments of the CAC-score in persons with no known coronary or other cardiovascular disease and no exercise-dependent chest pain or shortness of breath. The

CAC-score was determined with a multi-slice CT. Using the "step-and-shoot" acquisition protocol, the average dose was around 1 mSv.

**Results:** In the total group, a CAC-score of 0 was found in 35%, a CAC-score of  $>0$  up to  $<100$  in 36% and  $\geq 100$  in 29%. The percentage of the above mentioned 3 CAC-score groups depending on age and gender are listed in table 1.

**Conclusion:** With the support of the CAC-score, a prescription of statins can be avoided in up to appr. 60% of middle-aged male and up to appr. 80% of middle-aged female persons. On the other hand, the use of statin is reasonable in appr. two thirds of higher-aged male and one third of higher-aged female persons for primary prevention.

Table 1. CAC-score depending on age and gender in 16.083 assessments

| CAC-score                   | Age Groups |         |         |         |         |         |         |
|-----------------------------|------------|---------|---------|---------|---------|---------|---------|
|                             | 40–44 y    | 45–49 y | 50–54 y | 55–59 y | 60–64 y | 65–69 y | 70–75 y |
| Male Assessments (n=11271)  |            |         |         |         |         |         |         |
| 0                           | 59%        | 46%     | 34%     | 24%     | 16%     | 11%     | 4%      |
| $>0$ to $<100$              | 34%        | 40%     | 44%     | 43%     | 40%     | 35%     | 29%     |
| $\geq 100$                  | 7%         | 14%     | 22%     | 33%     | 44%     | 54%     | 67%     |
| Female Assessments (n=4812) |            |         |         |         |         |         |         |
| 0                           | 81%        | 79%     | 67%     | 58%     | 49%     | 35%     | 24%     |
| $>0$ to $<100$              | 17%        | 17%     | 25%     | 33%     | 35%     | 42%     | 40%     |
| $\geq 100$                  | 2%         | 4%      | 8%      | 9%      | 16%     | 23%     | 36%     |
